# Supplementary material
Source: PubMed Central journal article supplement (PMC5013792)
Supplement: rspb20160958supp1.pdf [file rspb20160958supp1.pdf]

SUPPLEMENTARY FIGURES AND TABLES FOR:

**Social connectedness is associated with fibrinogen level in a human social network**

David A. Kim, M.D., Ph.D.

Emelia J. Benjamin, M.D., Sc.M.

James H. Fowler, Ph.D.

Nicholas A. Christakis, M.D., Ph.D.

|                                                                                           |   |
|-------------------------------------------------------------------------------------------|---|
| Figure S1   Conversion of fibrinogen to fibrin by thrombin results in clot formation..... | 2 |
| Figure S2   Distributions of indegree, by edge type.....                                  | 3 |
| Figure S3   Outdegree is weakly associated with fibrinogen levels.....                    | 4 |
| Table S1   Linear models regressing fibrinogen levels on indegree .....                   | 5 |
| Table S2   Linear models regressing fibrinogen levels on outdegree .....                  | 9 |

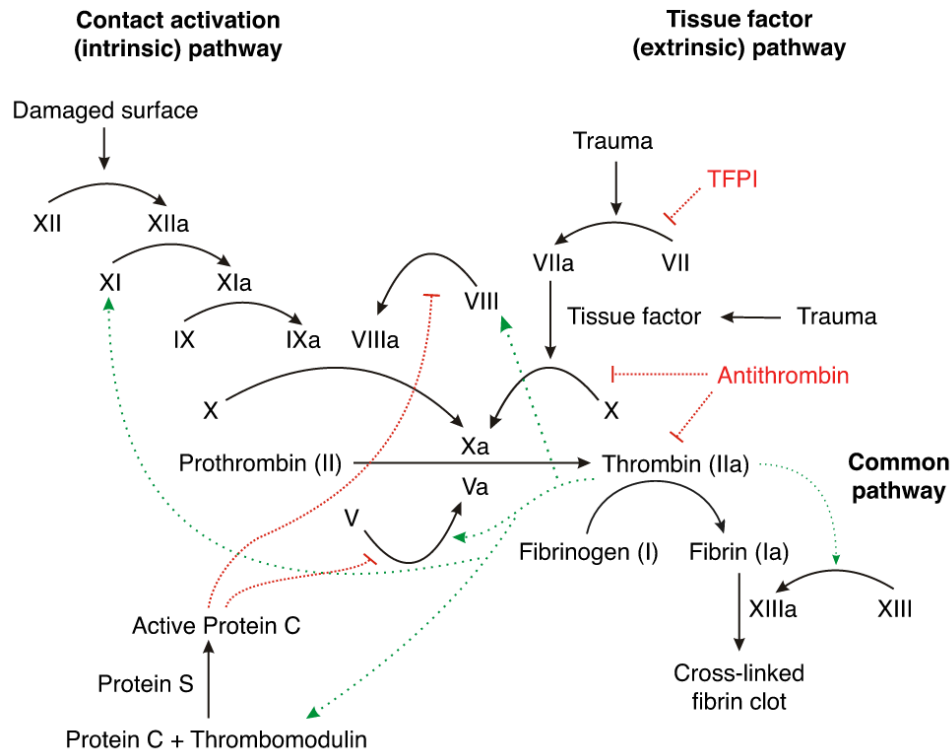

**Figure S1 | Conversion of fibrinogen to fibrin by thrombin results in clot formation.** The coagulation cascade is highly conserved across mammals. When the vascular endothelium is damaged by trauma, the exposure of subendothelial collagen and tissue factor trigger a sequence of reactions in which enzymes cleave downstream precursors into their enzymatically active (a) forms, terminating in the conversion by thrombin (Factor IIa) of fibrinogen (Factor I) to fibrin (Factor Ia). Fibrin is cross-linked by factor XIIIa to form a clot. Elevated levels of coagulation factors, including fibrinogen, produce a hypercoagulable state, increasing the risk of thrombotic disorders such as ischaemic heart disease and stroke.

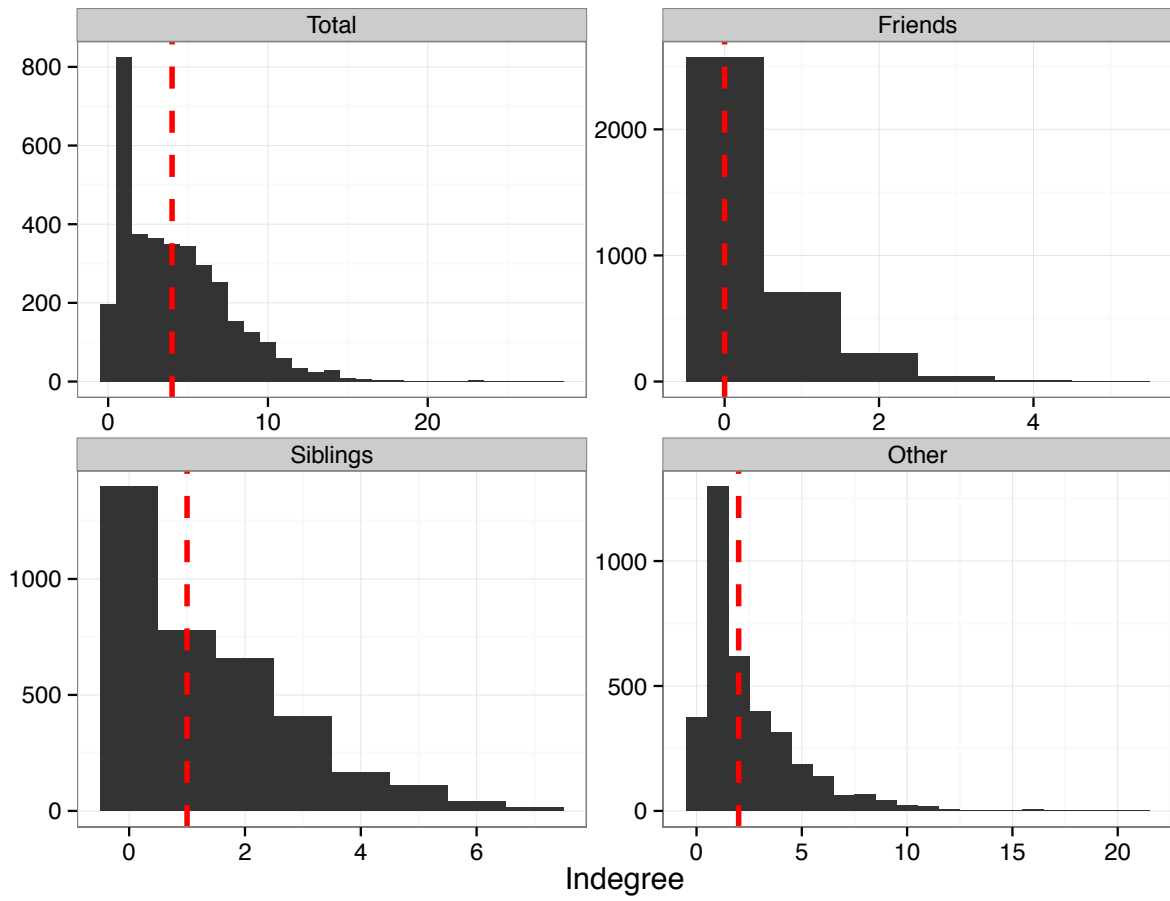

**Figure S2 | Distributions of indegree, by edge type.** Total indegree reflects ties of friendship, sibship, marriage, and other relatives. Dashed red lines indicate median values for the 3,568 individuals with fibrinogen measurements.

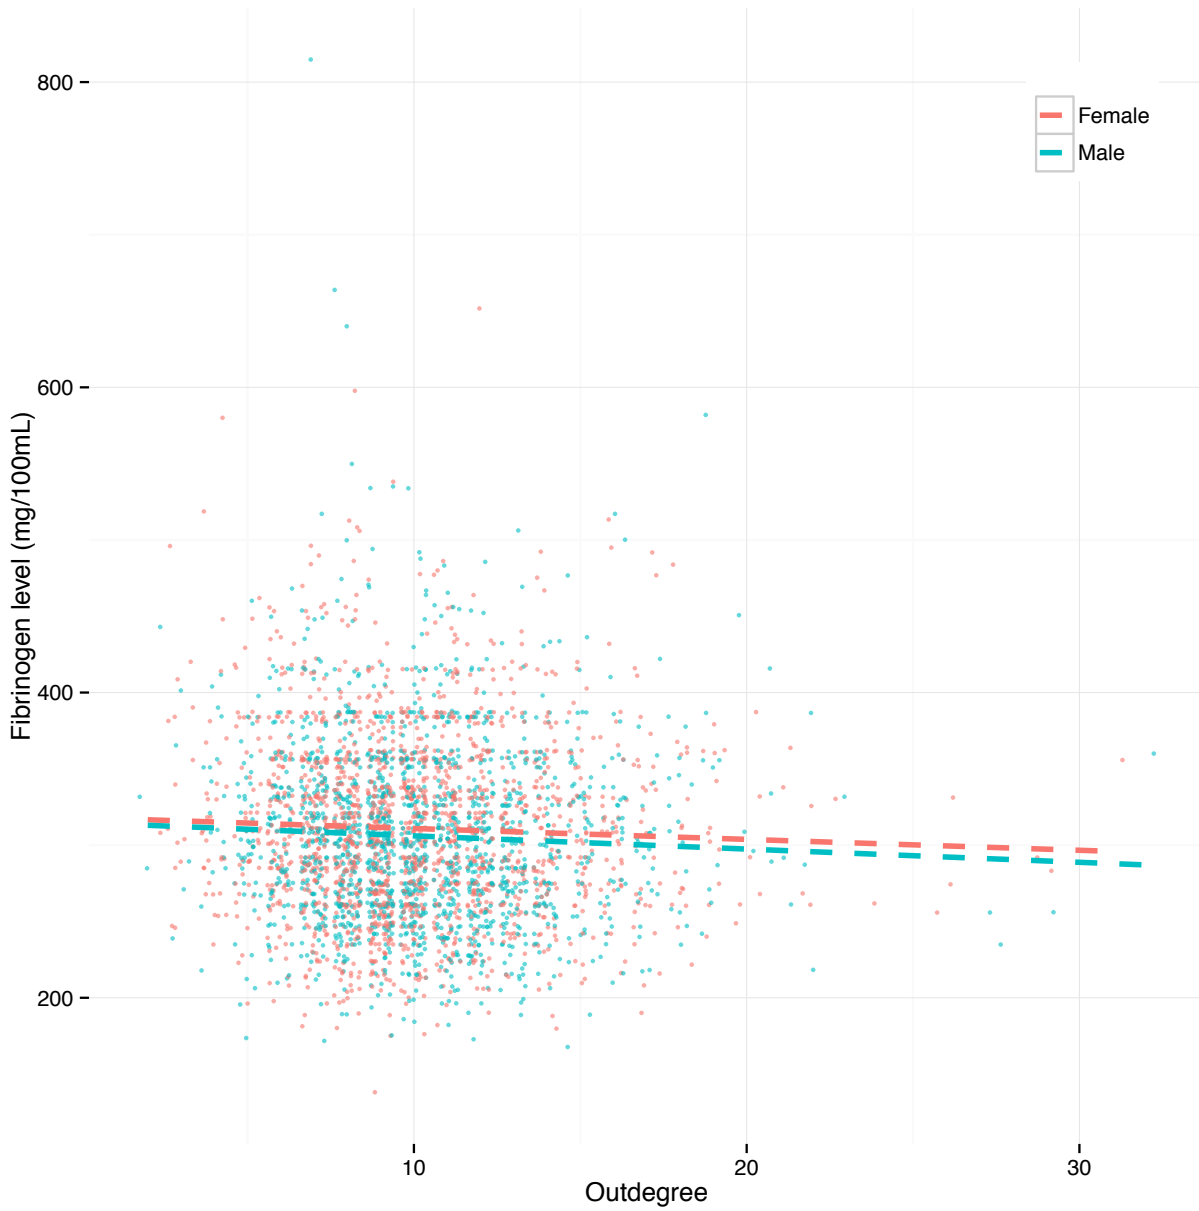

**Figure S3 | Outdegree is weakly associated with fibrinogen levels.** The number of social contacts named by a subject is weakly associated with the subject’s fibrinogen level ( $r = -0.04, p = 0.007$ ). Points are jittered horizontally to better depict the density of the data around discrete values of indegree.

**Table S1 | Linear models regressing fibrinogen levels on indegree**

|                           | <i>Model 1a</i><br><i>(Minimal model, adjusting for age, sex, education)</i> |             |             | <i>Model 1b</i><br><i>(Additionally adjusting for cardiac risk factors, and medication use)</i> |             |             |
|---------------------------|------------------------------------------------------------------------------|-------------|-------------|-------------------------------------------------------------------------------------------------|-------------|-------------|
|                           | Estimate                                                                     | SE          | p           | Estimate                                                                                        | SE          | p           |
| Intercept                 | 270.24                                                                       | 9.28        | 0.00        | 235.78                                                                                          | 13.51       | 0.00        |
| <b>Indegree</b>           | <b>-2.03</b>                                                                 | <b>0.30</b> | <b>0.00</b> | <b>-1.99</b>                                                                                    | <b>0.28</b> | <b>0.00</b> |
| Age                       | 1.44                                                                         | 0.11        | 0.00        | 1.28                                                                                            | 0.12        | 0.00        |
| Male                      | -3.06                                                                        | 2.07        | 0.14        | -13.52                                                                                          | 2.21        | 0.00        |
| Years of education        | -2.29                                                                        | 0.40        | 0.00        | -1.09                                                                                           | 0.38        | 0.00        |
| BMI                       |                                                                              |             |             | 2.37                                                                                            | 0.22        | 0.00        |
| Smoking                   |                                                                              |             |             | 23.15                                                                                           | 2.53        | 0.00        |
| Systolic BP 1             |                                                                              |             |             | 0.05                                                                                            | 0.14        | 0.74        |
| Systolic BP 2             |                                                                              |             |             | 0.09                                                                                            | 0.13        | 0.50        |
| Diastolic BP 1            |                                                                              |             |             | -0.36                                                                                           | 0.21        | 0.08        |
| Diastolic BP 2            |                                                                              |             |             | 0.02                                                                                            | 0.21        | 0.92        |
| HDL cholesterol           |                                                                              |             |             | -0.51                                                                                           | 0.07        | 0.00        |
| Total cholesterol         |                                                                              |             |             | 0.08                                                                                            | 0.03        | 0.00        |
| Anti-cholesterol 1        |                                                                              |             |             | -10.94                                                                                          | 8.41        | 0.19        |
| Anti-cholesterol 2        |                                                                              |             |             | -5.28                                                                                           | 7.27        | 0.47        |
| Anti-cholesterol 3        |                                                                              |             |             | 27.32                                                                                           | 6.33        | 0.00        |
| Anti-cholesterol 4        |                                                                              |             |             | -3.99                                                                                           | 4.47        | 0.37        |
| Anti-cholesterol 5        |                                                                              |             |             | -11.09                                                                                          | 17.66       | 0.53        |
| Renin-angiotensin blocker |                                                                              |             |             | 7.96                                                                                            | 3.41        | 0.02        |
| Beta blocker              |                                                                              |             |             | -0.51                                                                                           | 3.05        | 0.87        |
| Calcium channel blocker   |                                                                              |             |             | 8.73                                                                                            | 3.46        | 0.01        |
| Diuretic 1                |                                                                              |             |             | 3.79                                                                                            | 9.09        | 0.68        |
| Diuretic 2                |                                                                              |             |             | 6.20                                                                                            | 5.72        | 0.28        |
| Diuretic 3                |                                                                              |             |             | 10.21                                                                                           | 4.50        | 0.02        |
| Diuretic 4                |                                                                              |             |             | 4.08                                                                                            | 11.39       | 0.72        |
| Anti-depressant           |                                                                              |             |             | -1.60                                                                                           | 4.37        | 0.71        |
| N                         | 3057                                                                         |             |             | 3028                                                                                            |             |             |
| DF                        | 3052                                                                         |             |             | 3002                                                                                            |             |             |
| Adjusted R <sup>2</sup>   | 0.099                                                                        |             |             | 0.207                                                                                           |             |             |

|                             | <i>Model 2a</i><br><i>(Additionally adjusting for social contacts' fibrinogen)</i> |             |             | <i>Model 2b</i><br><i>(Friendship ties only)</i> |             |             |
|-----------------------------|------------------------------------------------------------------------------------|-------------|-------------|--------------------------------------------------|-------------|-------------|
|                             | Estimate                                                                           | SE          | p           | Estimate                                         | SE          | p           |
| Intercept                   | 197.50                                                                             | 15.41       | 0.00        | 185.26                                           | 15.33       | 0.00        |
| <b>Indegree</b>             | <b>-1.86</b>                                                                       | <b>0.29</b> | <b>0.00</b> | <b>-4.73</b>                                     | <b>1.37</b> | <b>0.00</b> |
| Age                         | 1.16                                                                               | 0.13        | 0.00        | 1.24                                             | 0.13        | 0.00        |
| Male                        | -13.36                                                                             | 2.31        | 0.00        | -12.95                                           | 2.32        | 0.00        |
| Years of education          | -0.97                                                                              | 0.41        | 0.02        | -0.95                                            | 0.41        | 0.02        |
| BMI                         | 2.28                                                                               | 0.23        | 0.00        | 2.29                                             | 0.23        | 0.00        |
| Smoking                     | 22.59                                                                              | 2.68        | 0.00        | 22.75                                            | 2.69        | 0.00        |
| Systolic BP 1               | 0.09                                                                               | 0.14        | 0.55        | 0.12                                             | 0.14        | 0.42        |
| Systolic BP 2               | 0.02                                                                               | 0.14        | 0.90        | 0.00                                             | 0.14        | 0.98        |
| Diastolic BP 1              | -0.28                                                                              | 0.22        | 0.20        | -0.33                                            | 0.22        | 0.13        |
| Diastolic BP 2              | 0.08                                                                               | 0.22        | 0.71        | 0.08                                             | 0.22        | 0.73        |
| HDL cholesterol             | -0.48                                                                              | 0.08        | 0.00        | -0.47                                            | 0.08        | 0.00        |
| Total cholesterol           | 0.07                                                                               | 0.03        | 0.01        | 0.07                                             | 0.03        | 0.01        |
| Anti-cholesterol 1          | -13.4                                                                              | 8.59        | 0.12        | -13.48                                           | 8.63        | 0.12        |
| Anti-cholesterol 2          | -5.8                                                                               | 7.44        | 0.44        | -5.97                                            | 7.48        | 0.42        |
| Anti-cholesterol 3          | 30.06                                                                              | 6.45        | 0.00        | 31.06                                            | 6.48        | 0.00        |
| Anti-cholesterol 4          | -2.15                                                                              | 4.87        | 0.66        | -1.74                                            | 4.89        | 0.72        |
| Anti-cholesterol 5          | -9.69                                                                              | 18.65       | 0.60        | -10.27                                           | 18.75       | 0.58        |
| Renin-angiotensin blocker   | 10.74                                                                              | 3.56        | 0.00        | 11.32                                            | 3.57        | 0.00        |
| Beta blocker                | -1.31                                                                              | 3.16        | 0.68        | -1.00                                            | 3.18        | 0.75        |
| Calcium channel blocker     | 7.74                                                                               | 3.57        | 0.03        | 7.81                                             | 3.59        | 0.03        |
| Diuretic 1                  | 6.14                                                                               | 9.35        | 0.51        | 5.97                                             | 9.40        | 0.52        |
| Diuretic 2                  | 8.66                                                                               | 5.83        | 0.14        | 8.39                                             | 5.86        | 0.15        |
| Diuretic 3                  | 11.27                                                                              | 4.65        | 0.02        | 10.80                                            | 4.68        | 0.02        |
| Diuretic 4                  | 1.94                                                                               | 11.63       | 0.87        | 2.36                                             | 11.69       | 0.84        |
| Anti-depressant             | -3.34                                                                              | 4.66        | 0.47        | -3.85                                            | 4.69        | 0.41        |
| Mean fibrinogen of contacts | 0.12                                                                               | 0.02        | 0.00        | 0.13                                             | 0.02        | 0.00        |
| N                           | 2724                                                                               |             |             | 2724                                             |             |             |
| DF                          | 2697                                                                               |             |             | 2697                                             |             |             |
| Adjusted R <sup>2</sup>     | 0.217                                                                              |             |             | 0.209                                            |             |             |

|                             | <i>Model 2c<br/>(Sibship ties only)</i> |             |             | <i>Model 3a<br/>(Log<sub>e</sub>-transforming indegree and<br/>fibrinogen)</i> |             |             |
|-----------------------------|-----------------------------------------|-------------|-------------|--------------------------------------------------------------------------------|-------------|-------------|
|                             | Estimate                                | SE          | p           | Estimate                                                                       | SE          | p           |
| Intercept                   | 198.07                                  | 15.50       | 0.00        | 5.38                                                                           | 0.05        | 0.00        |
| <b>Indegree</b>             | <b>-3.83</b>                            | <b>0.67</b> | <b>0.00</b> | <b>-0.04</b>                                                                   | <b>0.01</b> | <b>0.00</b> |
| Age                         | 1.18                                    | 0.13        | 0.00        | 0.00                                                                           | 0.00        | 0.00        |
| Male                        | -12.95                                  | 2.31        | 0.00        | -0.04                                                                          | 0.01        | 0.00        |
| Years of education          | -1.14                                   | 0.41        | 0.01        | -0.00                                                                          | 0.00        | 0.01        |
| BMI                         | 2.26                                    | 0.23        | 0.00        | 0.01                                                                           | 0.00        | 0.00        |
| Smoking                     | 22.59                                   | 2.68        | 0.00        | 0.07                                                                           | 0.01        | 0.00        |
| Systolic BP 1               | 0.10                                    | 0.14        | 0.49        | 0.00                                                                           | 0.00        | 0.65        |
| Systolic BP 2               | 0.02                                    | 0.14        | 0.89        | 0.00                                                                           | 0.00        | 0.89        |
| Diastolic BP 1              | -0.35                                   | 0.22        | 0.11        | -0.00                                                                          | 0.00        | 0.20        |
| Diastolic BP 2              | 0.11                                    | 0.22        | 0.61        | 0.00                                                                           | 0.00        | 0.54        |
| HDL cholesterol             | -0.49                                   | 0.08        | 0.00        | -0.00                                                                          | 0.00        | 0.00        |
| Total cholesterol           | 0.07                                    | 0.03        | 0.02        | 0.00                                                                           | 0.00        | 0.00        |
| Anti-cholesterol 1          | -12.46                                  | 8.60        | 0.15        | -0.04                                                                          | 0.03        | 0.15        |
| Anti-cholesterol 2          | -5.44                                   | 7.45        | 0.47        | -0.01                                                                          | 0.02        | 0.69        |
| Anti-cholesterol 3          | 29.40                                   | 6.46        | 0.00        | 0.08                                                                           | 0.02        | 0.00        |
| Anti-cholesterol 4          | -2.38                                   | 4.88        | 0.63        | -0.00                                                                          | 0.02        | 0.75        |
| Anti-cholesterol 5          | -7.89                                   | 18.68       | 0.67        | -0.02                                                                          | 0.06        | 0.67        |
| Renin-angiotensin blocker   | 11.05                                   | 3.56        | 0.00        | 0.03                                                                           | 0.01        | 0.01        |
| Beta blocker                | -1.14                                   | 3.17        | 0.72        | -0.00                                                                          | 0.01        | 0.96        |
| Calcium channel blocker     | 7.91                                    | 3.57        | 0.03        | 0.02                                                                           | 0.01        | 0.03        |
| Diuretic 1                  | 5.69                                    | 9.36        | 0.54        | 0.00                                                                           | 0.03        | 0.97        |
| Diuretic 2                  | 8.05                                    | 5.84        | 0.17        | 0.03                                                                           | 0.02        | 0.14        |
| Diuretic 3                  | 11.67                                   | 4.65        | 0.01        | 0.03                                                                           | 0.01        | 0.03        |
| Diuretic 4                  | 1.58                                    | 11.65       | 0.89        | 0.01                                                                           | 0.04        | 0.84        |
| Anti-depressant             | -3.17                                   | 4.67        | 0.50        | -0.01                                                                          | 0.01        | 0.33        |
| Mean fibrinogen of contacts | 0.13                                    | 0.02        | 0.00        | 0.00                                                                           | 0.00        | 0.00        |
| N                           | 2724                                    |             |             | 2724                                                                           |             |             |
| DF                          | 2697                                    |             |             | 2697                                                                           |             |             |
| Adjusted R <sup>2</sup>     | 0.215                                   |             |             | 0.232                                                                          |             |             |

**Model 3b**  
*(Log<sub>e</sub>-transforming fibrinogen alone)*

|                             | Estimate     | SE          | p           |
|-----------------------------|--------------|-------------|-------------|
| Intercept                   | 5.34         | 0.05        | 0.00        |
| <b>Indegree</b>             | <b>-0.01</b> | <b>0.00</b> | <b>0.00</b> |
| Age                         | 0.00         | 0.00        | 0.00        |
| Male                        | -0.04        | 0.01        | 0.00        |
| Years of education          | -0.00        | 0.00        | 0.01        |
| BMI                         | 0.01         | 0.00        | 0.00        |
| Smoking                     | 0.07         | 0.01        | 0.00        |
| Systolic BP 1               | 0.00         | 0.00        | 0.62        |
| Systolic BP 2               | 0.00         | 0.00        | 0.89        |
| Diastolic BP 1              | -0.00        | 0.00        | 0.19        |
| Diastolic BP 2              | 0.00         | 0.00        | 0.57        |
| HDL cholesterol             | -0.00        | 0.00        | 0.00        |
| Total cholesterol           | 0.00         | 0.00        | 0.00        |
| Anti-cholesterol 1          | -0.04        | 0.03        | 0.14        |
| Anti-cholesterol 2          | -0.01        | 0.02        | 0.66        |
| Anti-cholesterol 3          | 0.08         | 0.02        | 0.00        |
| Anti-cholesterol 4          | -0.00        | 0.02        | 0.79        |
| Anti-cholesterol 5          | -0.02        | 0.06        | 0.69        |
| Renin-angiotensin blocker   | 0.03         | 0.01        | 0.01        |
| Beta blocker                | -0.00        | 0.01        | 0.96        |
| Calcium channel blocker     | 0.02         | 0.01        | 0.03        |
| Diuretic 1                  | -0.00        | 0.03        | 1.00        |
| Diuretic 2                  | 0.03         | 0.02        | 0.15        |
| Diuretic 3                  | 0.03         | 0.01        | 0.03        |
| Diuretic 4                  | 0.01         | 0.04        | 0.85        |
| Anti-depressant             | -0.01        | 0.01        | 0.35        |
| Mean fibrinogen of contacts | 0.00         | 0.00        | 0.00        |
| N                           | 2724         |             |             |
| DF                          | 2697         |             |             |
| Adjusted R <sup>2</sup>     | 0.228        |             |             |



**Table S2 | Linear models regressing fibrinogen levels on outdegree**

|                             | <i>Model 4</i><br><i>(Adjusting for age, sex, education,<br/>cardiac risk factors, and medication use)</i> |             |             | <i>Model 5a</i><br><i>(Additionally adjusting for social<br/>contacts' fibrinogen)</i> |             |             |
|-----------------------------|------------------------------------------------------------------------------------------------------------|-------------|-------------|----------------------------------------------------------------------------------------|-------------|-------------|
|                             | Estimate                                                                                                   | SE          | p           | Estimate                                                                               | SE          | p           |
| Intercept                   | 234.50                                                                                                     | 14.00       | 0.00        | 193.73                                                                                 | 15.88       | 0.00        |
| <b>Outdegree</b>            | <b>-0.92</b>                                                                                               | <b>0.29</b> | <b>0.00</b> | <b>-0.84</b>                                                                           | <b>0.31</b> | <b>0.01</b> |
| Age                         | 1.36                                                                                                       | 0.12        | 0.00        | 1.23                                                                                   | 0.13        | 0.00        |
| Male                        | -13.02                                                                                                     | 2.22        | 0.00        | -12.63                                                                                 | 2.32        | 0.00        |
| Years of education          | -1.17                                                                                                      | 0.39        | 0.00        | -1.05                                                                                  | 0.41        | 0.01        |
| BMI                         | 2.37                                                                                                       | 0.22        | 0.00        | 2.28                                                                                   | 0.23        | 0.00        |
| Smoking                     | -23.29                                                                                                     | 2.55        | 0.00        | -22.65                                                                                 | 2.69        | 0.00        |
| Systolic BP 1               | 0.07                                                                                                       | 0.14        | 0.62        | 0.11                                                                                   | 0.14        | 0.46        |
| Systolic BP 2               | 0.08                                                                                                       | 0.13        | 0.53        | 0.02                                                                                   | 0.14        | 0.89        |
| Diastolic BP 1              | -0.42                                                                                                      | 0.21        | 0.05        | -0.34                                                                                  | 0.22        | 0.12        |
| Diastolic BP 2              | 0.02                                                                                                       | 0.21        | 0.92        | 0.08                                                                                   | 0.22        | 0.71        |
| HDL cholesterol             | -0.51                                                                                                      | 0.07        | 0.00        | -0.48                                                                                  | 0.08        | 0.00        |
| Total cholesterol           | 0.08                                                                                                       | 0.03        | 0.00        | 0.07                                                                                   | 0.03        | 0.01        |
| Anti-cholesterol 1          | -11.96                                                                                                     | 8.47        | 0.16        | -14.05                                                                                 | 8.64        | 0.10        |
| Anti-cholesterol 2          | -5.80                                                                                                      | 7.32        | 0.43        | -6.12                                                                                  | 7.49        | 0.41        |
| Anti-cholesterol 3          | 27.47                                                                                                      | 6.37        | 0.00        | 30.37                                                                                  | 6.49        | 0.00        |
| Anti-cholesterol 4          | -2.62                                                                                                      | 4.50        | 0.56        | -0.94                                                                                  | 4.90        | 0.85        |
| Anti-cholesterol 5          | -9.20                                                                                                      | 17.79       | 0.61        | -8.14                                                                                  | 18.76       | 0.66        |
| Renin-angiotensin blocker   | 8.46                                                                                                       | 3.43        | 0.01        | 11.27                                                                                  | 3.58        | 0.00        |
| Beta blocker                | -0.44                                                                                                      | 3.07        | 0.89        | -1.16                                                                                  | 3.18        | 0.72        |
| Calcium channel blocker     | 9.16                                                                                                       | 3.48        | 0.01        | 8.18                                                                                   | 3.59        | 0.02        |
| Diuretic 1                  | 3.86                                                                                                       | 9.16        | 0.67        | 6.38                                                                                   | 9.40        | 0.50        |
| Diuretic 2                  | 5.52                                                                                                       | 5.76        | 0.34        | 8.13                                                                                   | 5.87        | 0.17        |
| Diuretic 3                  | 10.12                                                                                                      | 4.54        | 0.03        | 11.36                                                                                  | 4.68        | 0.02        |
| Diuretic 4                  | 3.41                                                                                                       | 11.47       | 0.77        | 1.61                                                                                   | 11.71       | 0.89        |
| Anti-depressant             | -1.66                                                                                                      | 4.40        | 0.71        | -3.22                                                                                  | 4.69        | 0.49        |
| Mean fibrinogen of contacts |                                                                                                            |             |             | 0.13                                                                                   | 0.02        | 0.00        |
| N                           | 3028                                                                                                       |             |             | 2724                                                                                   |             |             |
| DF                          | 3002                                                                                                       |             |             | 2697                                                                                   |             |             |
| Adjusted R <sup>2</sup>     | 0.196                                                                                                      |             |             | 0.208                                                                                  |             |             |

*Model 5b*  
*(Friendship ties only)*

|                             | Estimate    | SE          | p           |
|-----------------------------|-------------|-------------|-------------|
| Intercept                   | 182.08      | 15.63       | 0.00        |
| <b>Outdegree</b>            | <b>0.11</b> | <b>2.06</b> | <b>0.96</b> |
| Age                         | 1.25        | 0.13        | 0.00        |
| Male                        | -12.66      | 2.32        | 0.00        |
| Years of education          | -0.93       | 0.41        | 0.02        |
| BMI                         | 2.28        | 0.23        | 0.00        |
| Smoking                     | -22.77      | 2.70        | 0.00        |
| Systolic BP 1               | 0.11        | 0.14        | 0.43        |
| Systolic BP 2               | 0.02        | 0.14        | 0.91        |
| Diastolic BP 1              | -0.36       | 0.22        | 0.10        |
| Diastolic BP 2              | 0.09        | 0.22        | 0.67        |
| HDL cholesterol             | -0.47       | 0.08        | 0.00        |
| Total cholesterol           | 0.07        | 0.03        | 0.01        |
| Anti-cholesterol 1          | -13.60      | 8.65        | 0.12        |
| Anti-cholesterol 2          | -6.33       | 7.50        | 0.40        |
| Anti-cholesterol 3          | 30.67       | 6.50        | 0.00        |
| Anti-cholesterol 4          | -1.26       | 4.90        | 0.80        |
| Anti-cholesterol 5          | -8.75       | 18.79       | 0.64        |
| Renin-angiotensin blocker   | 11.33       | 3.58        | 0.00        |
| Beta blocker                | -1.04       | 3.18        | 0.75        |
| Calcium channel blocker     | 7.91        | 3.60        | 0.03        |
| Diuretic 1                  | 5.99        | 9.42        | 0.52        |
| Diuretic 2                  | 8.51        | 5.87        | 0.15        |
| Diuretic 3                  | 11.66       | 4.68        | 0.01        |
| Diuretic 4                  | 2.42        | 11.72       | 0.84        |
| Anti-depressant             | -3.30       | 4.70        | 0.48        |
| Mean fibrinogen of contacts | 0.13        | 0.02        | 0.00        |
| N                           | 2724        |             |             |
| DF                          | 2697        |             |             |
| Adjusted R <sup>2</sup>     | 0.205       |             |             |
